# Supplementary material for: Knockdown of KCNQ1OT1 Suppresses Cell Invasion and Sensitizes Osteosarcoma Cells to CDDP by Upregulating DNMT1-Mediated Kcnq1 Expression
Source: PubMed Central journal article supplement — Mol Ther Nucleic Acids. 2019 Jun 27;17:804–18. doi: 10.1016/j.omtn.2019.06.010 (PMC6716066; doi:10.1016/j.omtn.2019.06.010), 2019-06-27
Supplement: mmc1.pdf [file mmc1.pdf]

OMTN, Volume 17

## **Supplemental Information**

**Knockdown of KCNQ1OT1 Suppresses Cell Invasion**

**and Sensitizes Osteosarcoma Cells to CDDP**

**by Upregulating DNMT1-Mediated Kcnq1 Expression**

**Xu Qi, Xiao-Jun Yu, Xu-Ming Wang, Tie-Nan Song, Jie Zhang, Xin-Zhen Guo, Guo-Jun Li, and Ming Shao**

## **SUPPLEMENTAL FIGURE LEGENDS**

**Supplemental Figure 1. The mRNA expression of Kcnq1 following oe-Kcnq1 and sh-Kcnq1 treatments.** \*,  $p < 0.05$  vs. the oe-NC group or the sh-NC group. The measurement data were expressed by mean  $\pm$  standard deviation. Comparisons among multiple groups were analyzed by one-way analysis of variance. The experiment was repeated 3 times.

**Supplemental Figure 2. Molecular mechanism of LncRNA mediated DNMT1 regulation of Kcnq1 expression on osteosarcoma cell invasion and CDDP chemosensitivity.** In osteosarcoma, KCNQ1OT1 shows abundant expression while Kcnq1 presents poor expression. Down-regulation of KCNQ1OT1 is considered to suppress Kcnq1 methylation and promote the level of Kcnq1 gene, thus inhibiting osteosarcoma cell proliferation, migration, invasion, and promoting CDDP chemosensitivity and apoptosis. CDDP, cisplatin; KCNQ1OT1, KCNQ1 opposite strand/antisense transcript 1; DNMT1, DNA methyltransferase 1.

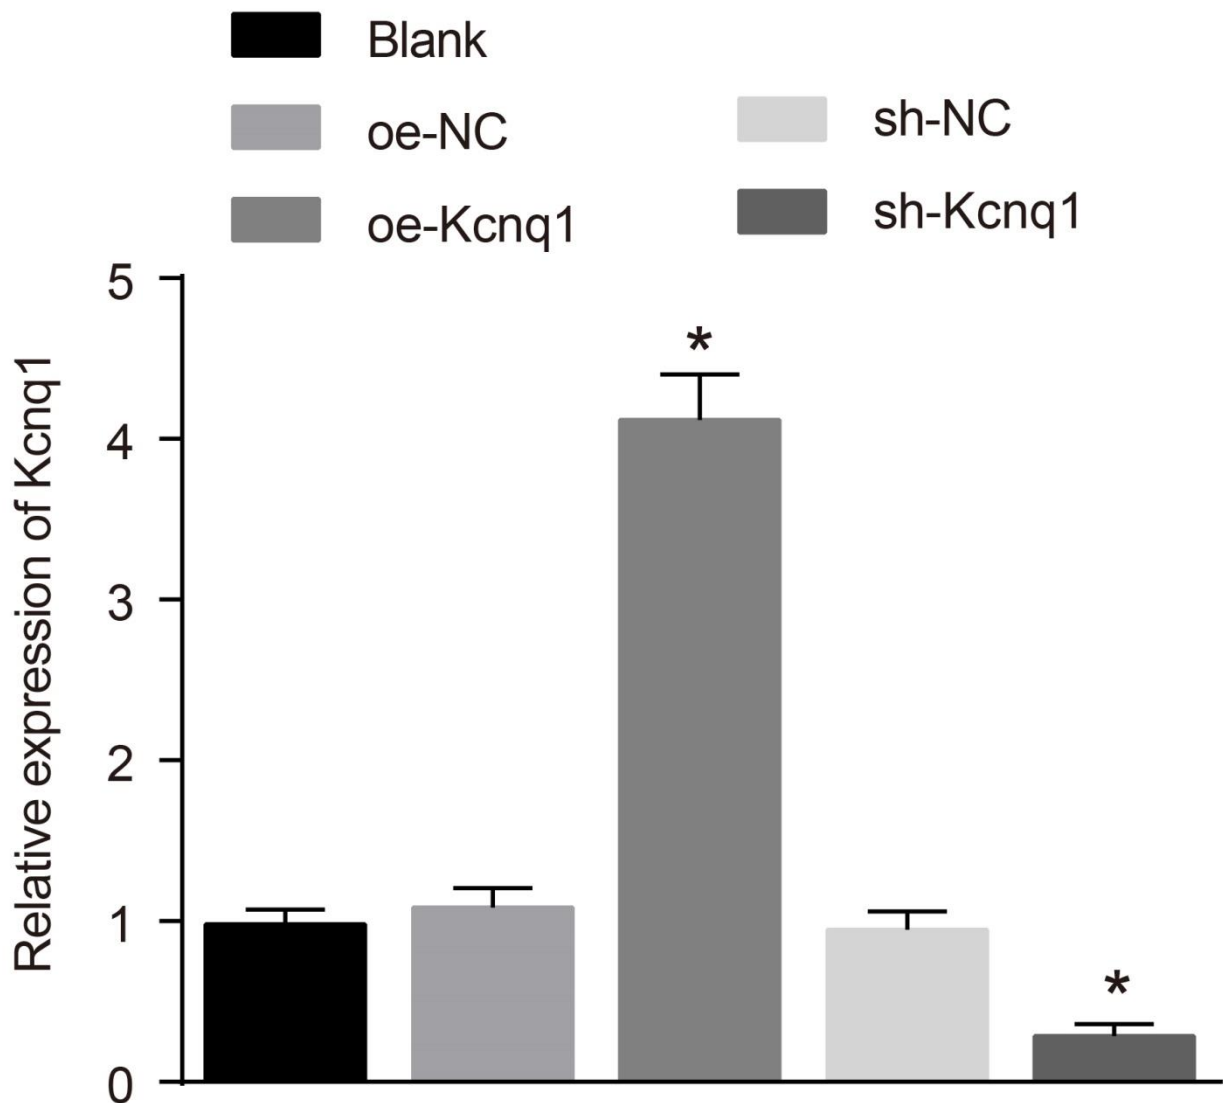

**Supplemental Figure 1. The mRNA expression of Kcnq1 following oe-Kcnq1 and sh-Kcnq1 treatments.** \*,  $p < 0.05$  vs. the oe-NC group or the sh-NC group. The measurement data were expressed by mean  $\pm$  standard deviation. Comparisons among multiple groups were analyzed by one-way analysis of variance. The experiment was repeated 3 times.

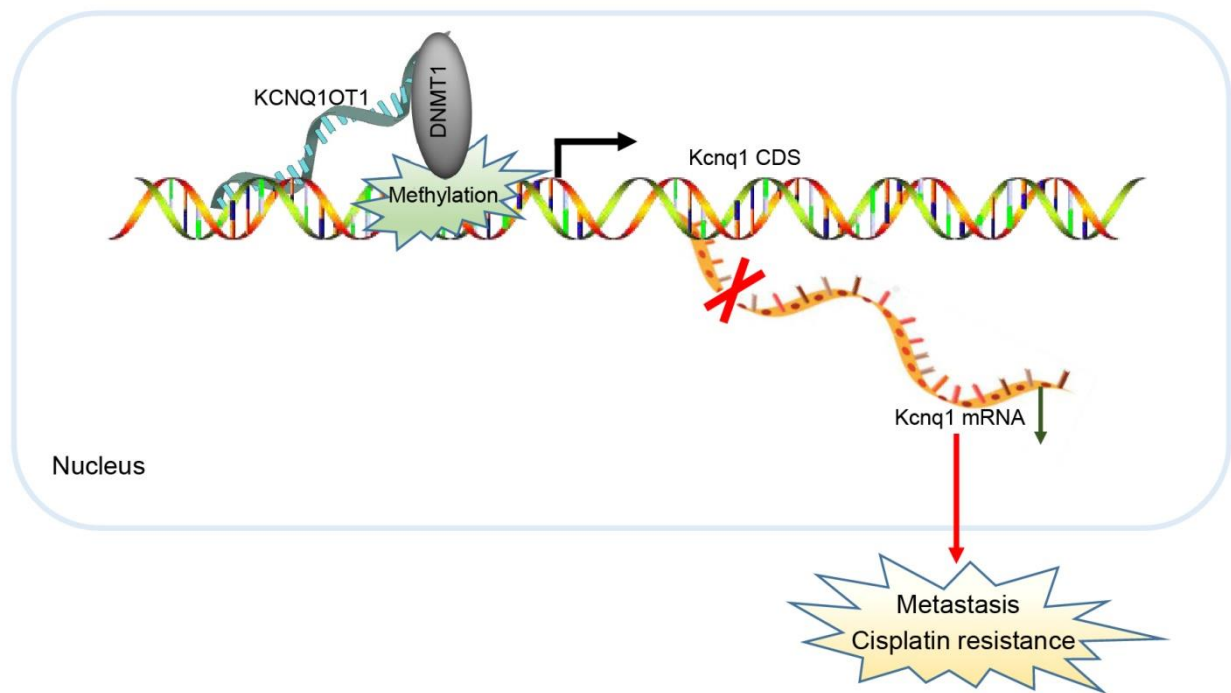

**Supplemental Figure 2. Molecular mechanism of LncRNA mediated DNMT1 regulation of Kcnq1 expression on osteosarcoma cell invasion and CDDP chemosensitivity.** In osteosarcoma, KCNQ1OT1 shows abundant expression while Kcnq1 presents poor expression. Down-regulation of KCNQ1OT1 is considered to suppress Kcnq1 methylation and promote the level of Kcnq1 gene, thus inhibiting osteosarcoma cell proliferation, migration, invasion, and promoting CDDP chemosensitivity and apoptosis. CDDP, cisplatin; KCNQ1OT1, KCNQ1 opposite strand/antisense transcript 1; DNMT1, DNA methyltransferase 1.
